# Supplementary material for: Adaptation costs for climate change-related cases of diarrhoeal disease, malnutrition, and malaria in 2030
Source: Springer Nature journal article supplement (doi:10.1186/1744-8603-4-9), 2008-01-01
Supplement: Additional file 4 [file 1744-8603-4-9-s4.doc]

**Table 4: Global Burden of Diseasecentral and high projections of the relative risk of *Plasmodium* *falciparum*** malaria for alternative climate scenarios relative to baseline climate

| **Sub-region** | **Climate** | **2000** | | **2010** | | **2020** | | **2030** | |
| --- | --- | --- | --- | --- | --- | --- | --- | --- | --- |
|  |  | Mid | High | Mid | High | Mid | High | Mid | High |
| Afr-D | S550 | 1.00 | 1.01 | 1.01 | 1.01 | 1.01 | 1.02 | 1.01 | 1.02 |
|  | S750 | 1.00 | 1.01 | 1.01 | 1.02 | 1.01 | 1.02 | 1.01 | 1.03 |
|  | UE | 1.01 | 1.01 | 1.01 | 1.03 | 1.02 | 1.04 | 1.02 | 1.05 |
| Afr-E | S550 | 1.02 | 1.04 | 1.04 | 1.08 | 1.06 | 1.12 | 1.07 | 1.15 |
|  | S750 | 1.02 | 1.05 | 1.05 | 1.10 | 1.07 | 1.15 | 1.09 | 1.18 |
|  | UE | 1.04 | 1.08 | 1.08 | 1.16 | 1.12 | 1.23 | 1.14 | 1.28 |
| Amr-A | S550 | 1.08 | 1.15 | 1.15 | 1.30 | 1.23 | 1.46 | 1.27 | 1.53 |
|  | S750 | 1.09 | 1.19 | 1.19 | 1.37 | 1.28 | 1.56 | 1.33 | 1.65 |
|  | UE | 1.15 | 1.26 | 1.29 | 1.59 | 1.44 | 1.88 | 1.51 | 2.03 |
| Amr-B | S550 | 1.02 | 1.04 | 1.04 | 1.09 | 1.07 | 1.13 | 1.08 | 1.16 |
|  | S750 | 1.03 | 1.05 | 1.05 | 1.11 | 1.08 | 1.16 | 1.10 | 1.19 |
|  | UE | 1.04 | 1.09 | 1.09 | 1.17 | 1.13 | 1.26 | 1.15 | 1.30 |
| Amr-D | S550 | 1.01 | 1.02 | 1.02 | 1.05 | 1.03 | 1.07 | 1.04 | 1.09 |
|  | S750 | 1.01 | 1.03 | 1.03 | 1.06 | 1.04 | 1.08 | 1.05 | 1.10 |
|  | UE | 1.02 | 1.04 | 1.04 | 1.09 | 1.07 | 1.13 | 1.08 | 1.17 |
| Emr-B | S550 | 1.00 | 1.00 | 1.00 | 1.00 | 1.00 | 1.00 | 1.00 | 1.00 |
|  | S750 | 1.00 | 1.00 | 1.00 | 1.00 | 1.00 | 1.00 | 1.00 | 1.00 |
|  | UE | 1.00 | 1.00 | 1.00 | 1.00 | 1.00 | 1.00 | 1.00 | 1.00 |
| Emr-D | S550 | 1.03 | 1.07 | 1.07 | 1.13 | 1.10 | 1.20 | 1.15 | 1.30 |
|  | S750 | 1.04 | 1.08 | 1.08 | 1.16 | 1.12 | 1.24 | 1.19 | 1.37 |
|  | UE | 1.06 | 1.13 | 1.13 | 1.26 | 1.19 | 1.38 | 1.29 | 1.59 |
| Eur-A | S550 | 1.00 | 1.00 | 1.00 | 1.00 | 1.00 | 1.00 | 1.00 | 1.00 |
|  | S750 | 1.00 | 1.00 | 1.00 | 1.00 | 1.00 | 1.00 | 1.00 | 1.00 |
|  | UE | 1.00 | 1.00 | 1.00 | 1.00 | 1.00 | 1.00 | 1.00 | 1.00 |
| Eur-B | S550 | 1.00 | 1.00 | 1.00 | 1.00 | 1.00 | 1.00 | 1.00 | 1.00 |
|  | S750 | 1.00 | 1.00 | 1.00 | 1.00 | 1.00 | 1.00 | 1.00 | 1.00 |
|  | UE | 1.00 | 1.00 | 1.00 | 1.00 | 1.00 | 1.00 | 1.00 | 1.00 |
| Eur-C | S550 | 1.07 | 1.13 | 1.13 | 1.27 | 1.00 | 1.20 | 1.25 | 1.50 |
|  | S750 | 1.08 | 1.16 | 1.16 | 1.33 | 1.00 | 1.25 | 1.31 | 1.61 |
|  | UE | 1.13 | 1.26 | 1.26 | 1.52 | 1.00 | 1.39 | 1.48 | 1.97 |
| Sear-B | S550 | 1.00 | 1.00 | 1.00 | 1.00 | 1.05 | 1.00 | 1.00 | 1.00 |
|  | S750 | 1.00 | 1.00 | 1.00 | 1.00 | 1.09 | 1.00 | 1.00 | 1.00 |
|  | UE | 1.00 | 1.00 | 1.00 | 1.00 | 1.00 | 1.00 | 1.00 | 1.00 |
| Sear-D | S550 | 1.00 | 1.00 | 1.00 | 1.00 | 1.00 | 1.00 | 1.00 | 1.01 |
|  | S750 | 1.00 | 1.00 | 1.00 | 1.00 | 1.00 | 1.00 | 1.01 | 1.01 |
|  | UE | 1.00 | 1.00 | 1.00 | 1.01 | 1.01 | 1.01 | 1.01 | 1.02 |
| Wpr-A | S550 | 1.07 | 1.14 | 1.14 | 1.28 | 1.21 | 1.42 | 1.25 | 1.49 |
|  | S750 | 1.09 | 1.17 | 1.17 | 1.34 | 1.26 | 1.52 | 1.30 | 1.60 |
|  | UE | 1.14 | 1.27 | 1.27 | 1.54 | 1.41 | 1.81 | 1.48 | 1.95 |
| Wpr-B | S550 | 1.06 | 1.12 | 1.12 | 1.25 | 1.18 | 1.37 | 1.22 | 1.43 |
|  | S750 | 1.08 | 1.15 | 1.15 | 1.30 | 1.23 | 1.45 | 1.26 | 1.53 |
|  | UE | 1.12 | 1.24 | 1.24 | 1.48 | 1.36 | 1.71 | 1.42 | 1.83 |
